# Supplementary material for: Postimplant Phosphodiesterase Type 5 Inhibitors Use Is Associated With Lower Rates of Thrombotic Events After Left Ventricular Assist Device Implantation
Source: PubMed Central journal article supplement — J Am Heart Assoc. 2020 Jul 10;9(14):e015897. doi: 10.1161/JAHA.119.015897 (PMC7660717; doi:10.1161/jaha.119.015897), 2020-07-10
Supplement: JAH3-9-e015897-s001.pdf [file JAH3-9-e015897-s001.pdf]

# **SUPPLEMENTAL MATERIAL**

## **Data S1.**

### **Supplemental Methods**

#### **INTERMACS Definitions**

- Ischemic stroke is defined as a new acute neurologic deficit of any duration associated with acute infarction on imaging corresponding anatomically to the clinical deficit.
- Hemorrhagic stroke (acute symptomatic intracranial hemorrhage) is defined as new acute neurologic deficit attributable to intracranial hemorrhage.

**Table S1. Variables considered for inclusion into all endpoint models.**

|                                                      |
|------------------------------------------------------|
| <b>Demographics</b>                                  |
| Age                                                  |
| Body Mass Index (BMI)                                |
| Sex                                                  |
| Race                                                 |
| <b>Medical History</b>                               |
| Smoking status                                       |
| History of non-compliance                            |
| History of alcoholism                                |
| History of drug abuse                                |
| History of arrhythmia                                |
| History of atrial fibrillation                       |
| History of cancer                                    |
| History of chronic coagulopathy                      |
| History of pulmonary disease                         |
| History of pulmonary hypertension                    |
| History of Peripheral Vascular Disease               |
| History of renal disease                             |
| History of stroke                                    |
| Diabetes                                             |
| Current Implantable Cardioverter Defibrillator (ICD) |
| New York Heart Association classification (NYHA)     |
| Blood pressure                                       |
| INTERMACS profile                                    |

|                                                 |
|-------------------------------------------------|
| Type of LVAD (axial or centrifugal)             |
| Destination therapy                             |
| Year of implant                                 |
| <b>Laboratory Measurements</b>                  |
| Hemoglobin                                      |
| Sodium                                          |
| Platelets                                       |
| White Blood Cells                               |
| Blood Urea Nitrogen (BUN)                       |
| Bilirubin                                       |
| Creatinine                                      |
| Lactate Dehydrogenase (LDH)                     |
| International Normalized Ratio (INR)            |
| <b>Medications</b>                              |
| Antiplatelet therapy                            |
| Warfarin                                        |
| Inotropes                                       |
| Baseline use of PDE-5 inhibitors                |
| <b>Interventions within 48 hours of implant</b> |
| Ventilator                                      |
| Intra-Aortic Balloon Pump (IABP)                |
| Extracorporeal Membrane Oxygenation (ECMO)      |
| Dialysis                                        |

*LVAD: Left Ventricular Assist Device, INTERMACS: Interagency Registry for Mechanically Assisted Circulatory Support*

**Table S2. Significant variables included in logistic model for administration of PDE-5 inhibitors (Propensity score model)\***

|                                                      |
|------------------------------------------------------|
| <b>Demographics</b>                                  |
| Age                                                  |
| Sex                                                  |
| Race                                                 |
| <b>Medical History</b>                               |
| Smoking status                                       |
| History of non-compliance                            |
| History of chronic coagulopathy                      |
| History of pulmonary disease                         |
| History of pulmonary hypertension                    |
| History of renal disease                             |
| Current Implantable Cardioverter Defibrillator (ICD) |
| New York Heart Association classification (NYHA)     |
| Type of LVAD (axial or centrifugal)                  |
| <b>Laboratory Measurements</b>                       |
| Hemoglobin                                           |
| Bilirubin                                            |
| <b>Medications</b>                                   |
| Antiplatelet therapy                                 |
| Warfarin                                             |
| <b>Interventions within 48 hours of implant</b>      |
| Ventilator                                           |

*LVAD: Left Ventricular Assist Device*

*\* All variables listed in Table S1 were considered and variables with a  $P < 0.05$  were included in logistic model.*

**Table S3. Significant variables included in final adjusted models for each endpoint.**

| Endpoint                           | Variables included in final adjusted model*                                                                                                                                                                                                                        |
|------------------------------------|--------------------------------------------------------------------------------------------------------------------------------------------------------------------------------------------------------------------------------------------------------------------|
| Pump thrombosis or ischemic stroke | Age<br>Sex<br>Body Mass Index (BMI)<br>Race<br>Smoking status<br>History of non-compliance<br>History of pulmonary disease<br>History of pulmonary hypertension<br>Pre-implant hemoglobin<br>Pre-implant bilirubin<br>Patient INTERMACS profile<br>Year of implant |
| Pump thrombosis                    | Age<br>Sex<br>Body Mass Index (BMI)<br>Race<br>History of non-compliance<br>History of pulmonary disease<br>Pre-implant hemoglobin<br>Type of continuous flow LVAD (centrifugal, axial)                                                                            |
| Ischemic stroke                    | Age<br>Smoking status                                                                                                                                                                                                                                              |

|                                                                |                                                                                                                                                                                                                                                                                                                                                                                       |
|----------------------------------------------------------------|---------------------------------------------------------------------------------------------------------------------------------------------------------------------------------------------------------------------------------------------------------------------------------------------------------------------------------------------------------------------------------------|
|                                                                | <p>History of pulmonary disease</p> <p>Type of continuous flow LVAD (centrifugal, axial)</p> <p>Dialysis within last 48 hours</p> <p>Systolic blood pressure</p> <p>Pre-implant antiplatelet therapy</p> <p>Pre-implant creatinine</p> <p>History of diabetes</p> <p>History of arrhythmia</p>                                                                                        |
| <p>All-cause mortality, pump thrombosis or ischemic stroke</p> | <p>Age</p> <p>Body Mass Index (BMI)</p> <p>Sex</p> <p>Race</p> <p>Smoking status</p> <p>History of non-compliance</p> <p>Log (Blood Urea Nitrogen)</p> <p>History of pulmonary disease</p> <p>Type of continuous flow LVAD (centrifugal, axial)</p> <p>LVAD as destination therapy</p> <p>History of cancer</p> <p>Patient INTERMACS profile</p> <p>Dialysis within last 48 hours</p> |

**Table S3. Significant variables included in final adjusted models for each endpoint***(Continued)*

| <b>Endpoint</b>     | <b>Variables included in final adjusted model*</b>                                                                                                                                                                                                                                                                                                                              |
|---------------------|---------------------------------------------------------------------------------------------------------------------------------------------------------------------------------------------------------------------------------------------------------------------------------------------------------------------------------------------------------------------------------|
| All-cause Mortality | Age<br>Smoking status<br>Hemoglobin, g/dL<br>Log (Blood Urea Nitrogen)<br>Platelets (x10/L)<br>History of pulmonary disease<br>Type of continuous flow LVAD (centrifugal, axial)<br>LVAD as destination therapy<br>History of cancer<br>History of Peripheral Vascular Disease<br>Patient INTERMACS profile<br>Systolic Blood Pressure<br>Dialysis within last 48 hours<br>Race |
| Hemorrhagic stroke  | Type of continuous flow LVAD (centrifugal, axial)<br>Sex<br>Patient INTERMACS profile<br>Body Mass Index (BMI)<br>Intra-Aortic Balloon Pump (IABP) within last 48 hours                                                                                                                                                                                                         |



|                           |                                                                                                                                                                                                                                                                                             |
|---------------------------|---------------------------------------------------------------------------------------------------------------------------------------------------------------------------------------------------------------------------------------------------------------------------------------------|
|                           | Log (creatinine)<br>Hemoglobin, g/dL                                                                                                                                                                                                                                                        |
| Gastrointestinal bleeding | Age<br>Hemoglobin<br>History of pulmonary disease<br>Race<br>Log (Blood Urea Nitrogen)<br>Dialysis within last 48 hours<br>History of Peripheral Vascular Disease<br>Smoking status<br>History of cancer<br>Body Mass Index (BMI)<br>Antiplatelet therapy<br>History of atrial fibrillation |

*\* All variables listed in Table S1 were considered for each endpoint and variables with a  $P < 0.05$  were retained in the final adjusted model*

*LVAD: Left Ventricular Assist Device, INTERMACS: Interagency Registry for Mechanically Assisted Circulatory Support*

**Table S4. Risk estimates for PDE-5 inhibitor within six months post-implant and after six months post-implant.**

| Endpoint                                                | PDE-5 Inhibitor vs<br>No PDE-5 Inhibitor |         |
|---------------------------------------------------------|------------------------------------------|---------|
|                                                         | Adjusted Hazard Ratio<br>(95% CI)*       | P Value |
| Pump thrombosis or ischemic stroke (primary endpoint)   |                                          |         |
| < 6 months post-implant                                 | 0.81 (0.72-0.91)                         | 0.003   |
| ≥ 6 months post-implant                                 | 0.88 (0.78-0.99)                         | 0.042   |
| Pump thrombosis                                         |                                          |         |
| < 6 months post-implant                                 | 0.70 (0.61-0.81)                         | <0.001  |
| ≥ 6 months post-implant                                 | 0.93 (0.81-1.06)                         | 0.258   |
| Ischemic stroke                                         |                                          |         |
| < 6 months post-implant                                 | 0.94 (0.79-1.12)                         | 0.458   |
| ≥ 6 months post-implant                                 | 0.72 (0.57-0.90)                         | 0.003   |
| All-cause mortality                                     |                                          |         |
| <6 month post-implant                                   | 0.73 (0.65-0.82)                         | <0.001  |
| ≥ 6 month post-implant                                  | 0.98 (0.88-1.10)                         | 0.755   |
| All-cause mortality, pump thrombosis or ischemic stroke |                                          |         |
| <6 month post-implant                                   | 0.76 (0.70-83)                           | <0.001  |
| ≥ 6 month post-implant                                  | 0.95 (0.87-1.04)                         | 0.247   |

\*Each model weighted by the inverse probability of treatment and adjusted for the variables listed in

**Table S3.** Dummy variables were created to represent PDE-5i use prior to 6 months and PDE-5i use after 6 months.

**Table S5. Relationship between the timing of use of PDE-5 inhibitor (pre-implant, post-implant) and the primary endpoint.**

| <b>Variable</b>                 | <b>Adjusted Hazard Ratio*<br/>(95% CI)</b> | <b>P Value</b> |
|---------------------------------|--------------------------------------------|----------------|
| No PDE-5i (n=8399)              | ref                                        | N/A            |
| Pre-implant PDE-5i<br>(n=423)   | 0.92 (0.72-1.16)                           | 0.478          |
| Post-implant PDE-5i<br>(n=3998) | 0.82 (0.75-0.90)                           | <0.001         |

*\*Adjusted for the variables listed in Table S3 for the primary endpoint.*

**Table S6. Time to occurrence (months) of the primary endpoint to both groups stratified by LDH at 1-month post LVAD implant.**

| Any PDE-5 inhibitor use post-implant | LDH (U/L)            | Number of observations | Mean (months) | Median (months) |
|--------------------------------------|----------------------|------------------------|---------------|-----------------|
|                                      | 1-month post implant |                        |               |                 |
| No                                   | <400                 | 762                    | 10.49         | 7.00            |
|                                      | 400-700              | 285                    | 7.55          | 3.00            |
|                                      | >700                 | 174                    | 4.91          | 2.00            |
| Yes                                  | <400                 | 388                    | 10.32         | 7.00            |
|                                      | 400-700              | 196                    | 9.88          | 5.00            |
|                                      | >700                 | 73                     | 5.82          | 2.00            |

*LDH: Lactate Dehydrogenase*

**Figure S1. Symbols indicate the absolute standardized differences for each variable.**

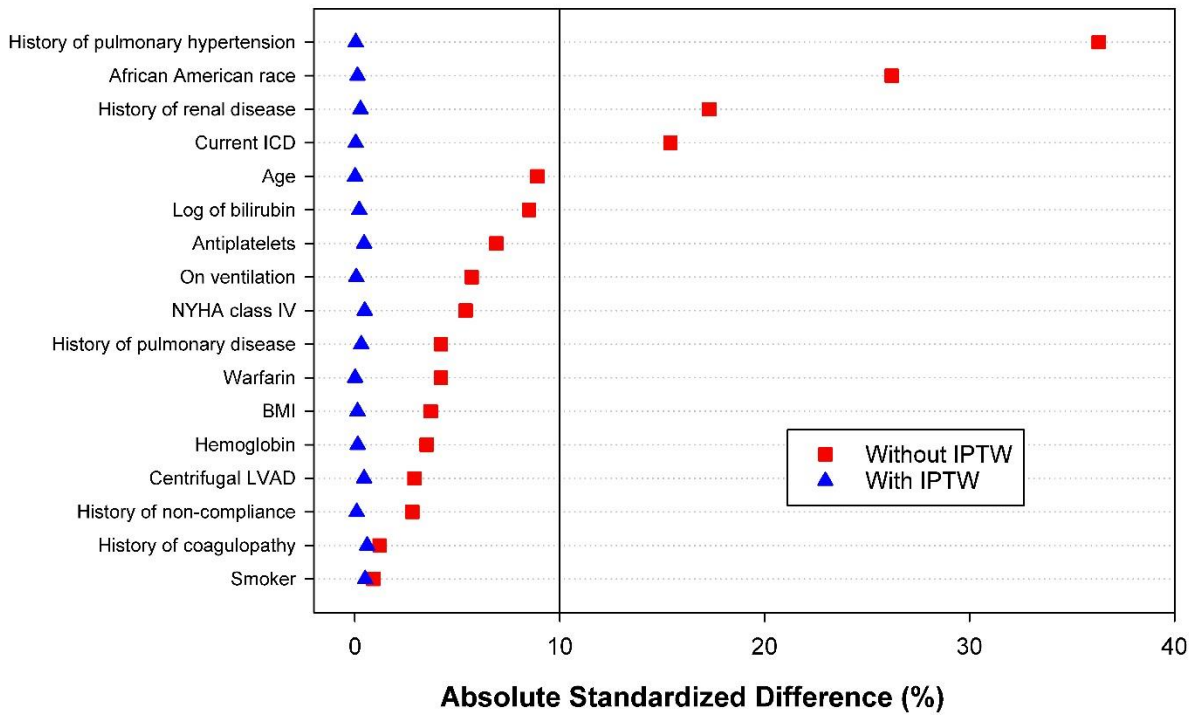

Absolute standardized differences are the absolute value of the difference in mean values between treatments groups divided by the square root of  $[(\text{standard deviation of mean1} + \text{standard deviation of mean2}) \div 2]$ . Larger standardized difference indicates greater imbalance between treatment groups. ***IPTW***: inverse probability treatment weighting; ***ICD***: Implantable Cardioverter Defibrillator; ***NYHA***: New York Heart Association; ***BMI***: Body Mass Index; ***LVAD***: Left Ventricular Assist Device

**Figure S2. Comparison of the frequency of aspirin use with time post-LVAD implantation between PDE-5 and no-PDE-5 inhibitor group.**

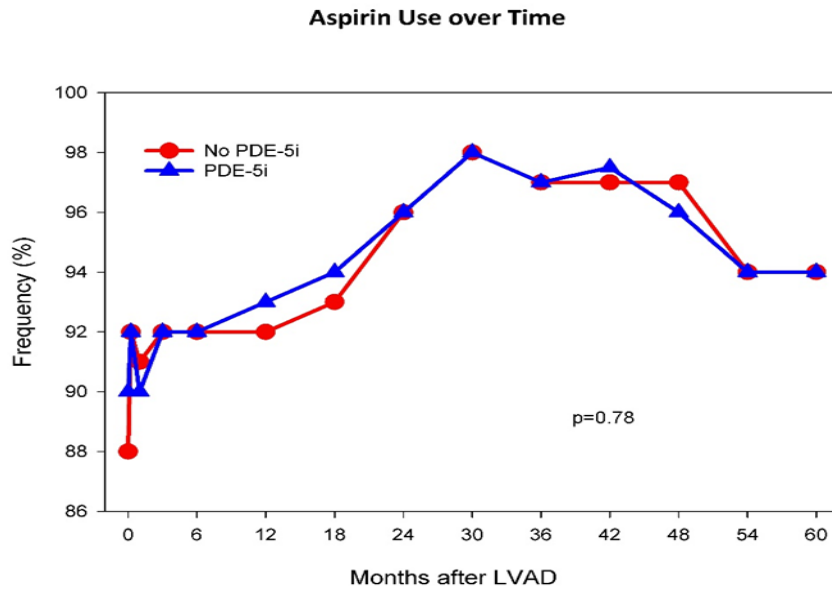

No difference was observed ( $p=0.78$ ).

**Figure S3. Comparison of the frequency of antiplatelet treatment use (including aspirin) with time post-LVAD implantation between PDE-5 and no-PDE-5 inhibitor group.**

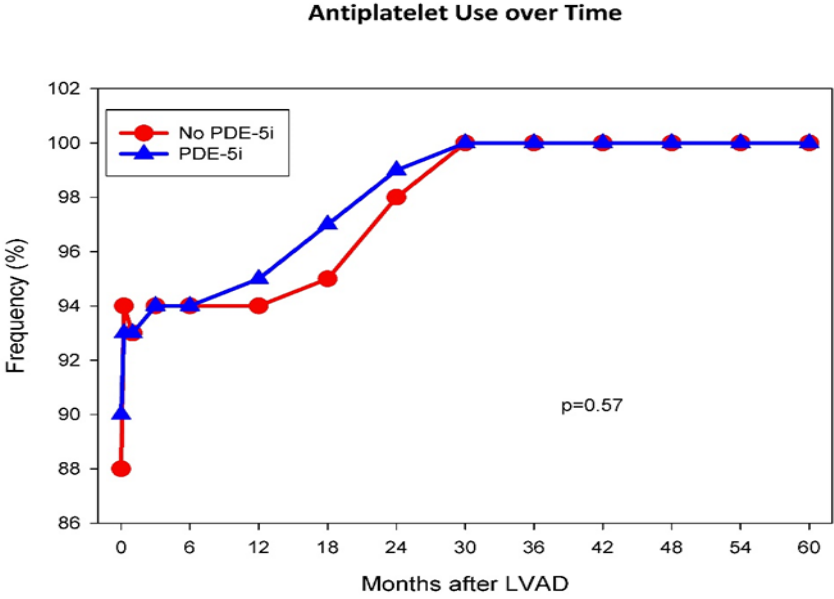

No difference was observed (p=0.57).



**Figure S4. Comparison of the INR values post-LVAD implantation with time between PDE-5 and no-PDE-5 inhibitor group.**

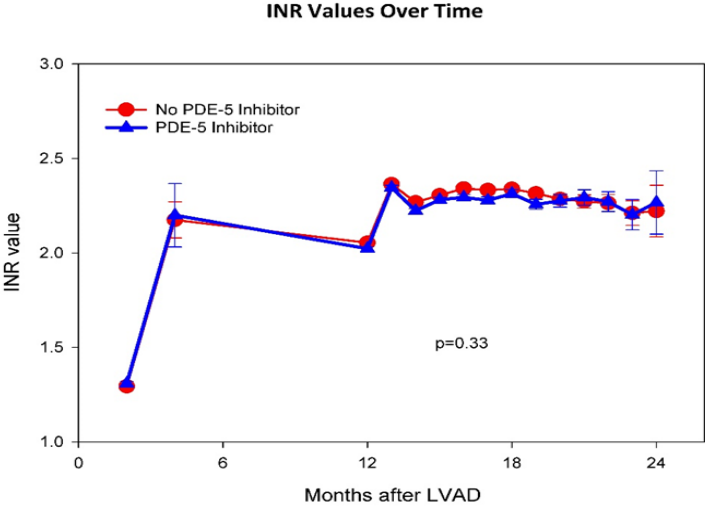

No difference was observed ( $p=0.33$ ).

**Figure S5. Cumulative incidence curves for the primary endpoint by LVAD type.**

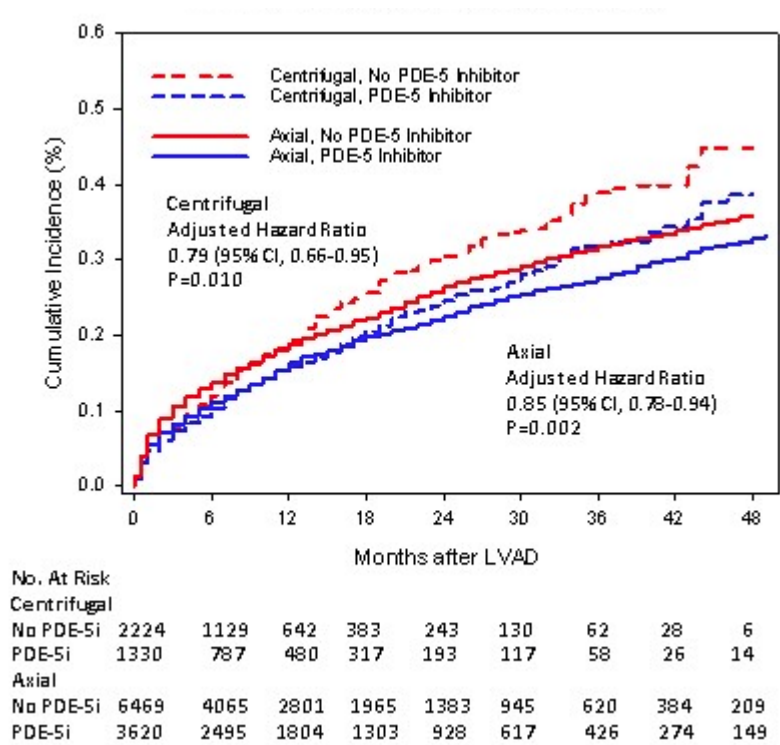

Patients on PDE-5 inhibitors (both with axial and centrifugal LVADs) exhibit significantly lower risk compared with those not on PDE-5 inhibitors at 48 months.

**Figure S6. Cumulative incidence curves for all-cause mortality.**

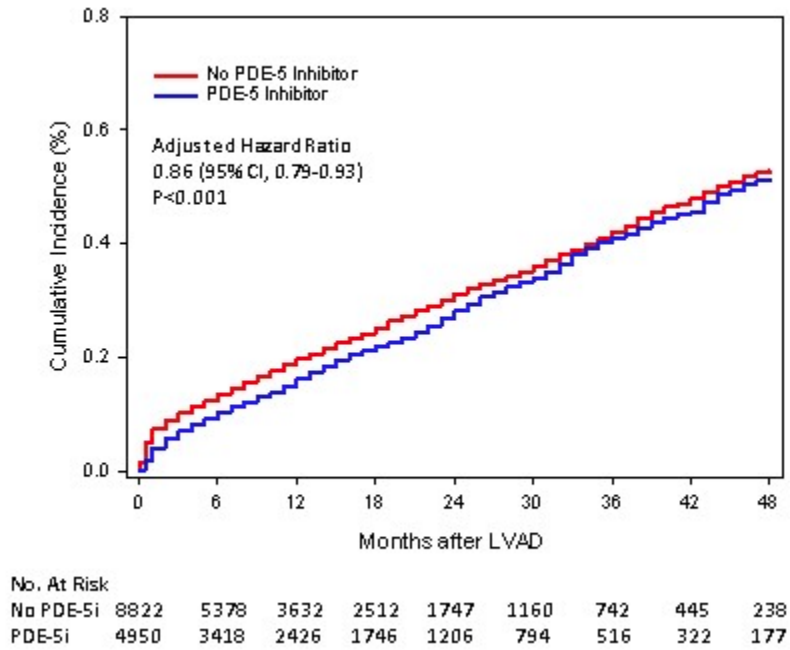

Patients on PDE-5 inhibitors have 14% lower risk for all-cause mortality compared to those not on PDE-5 inhibitors at 48 months.

**Figure S7. Cumulative incidence curves for all-cause mortality, pump thrombosis or ischemic stroke.**

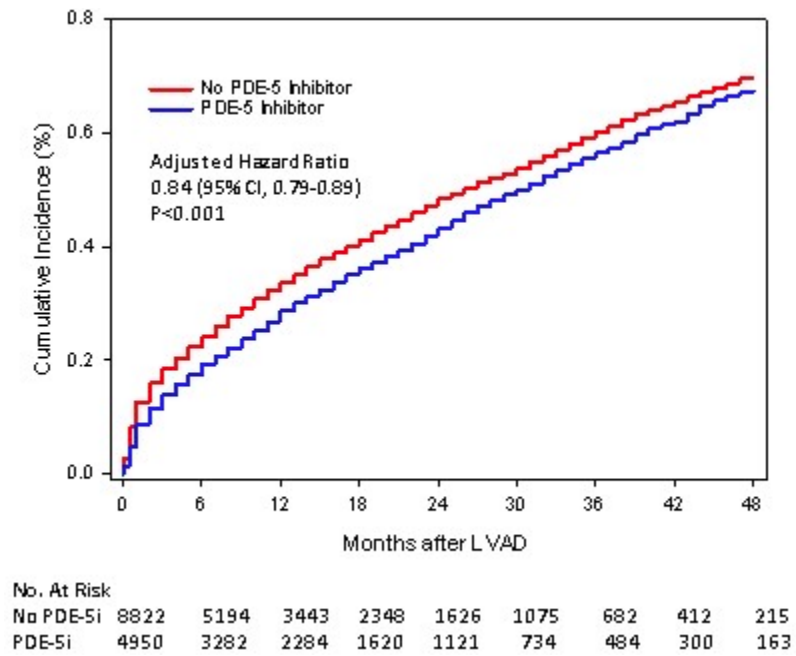

The use of PDE-5 inhibitors is associated with 16% lower risk for adverse events.

**Figure S8. Comparison of LDH values with time between the PDE-5 and no-PDE-5 inhibitor groups.**

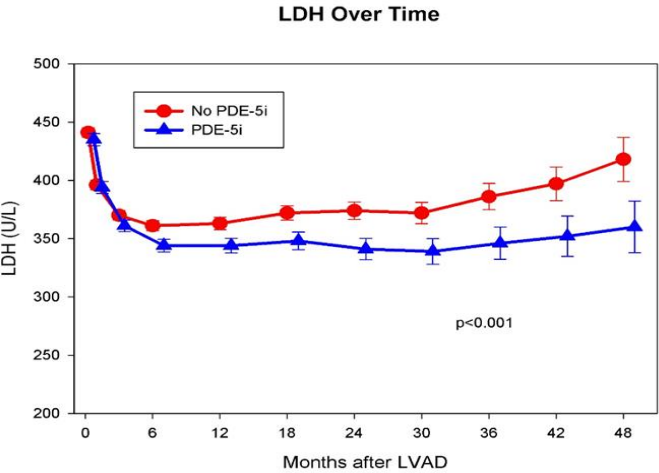

Patients on PDE-5 inhibitors exhibited significantly lower LDH values

**Figure S9. Comparison of LDH as a continuous variable 1-month post LVAD implantation between PDE-5 and no-PDE-5 inhibitors.**

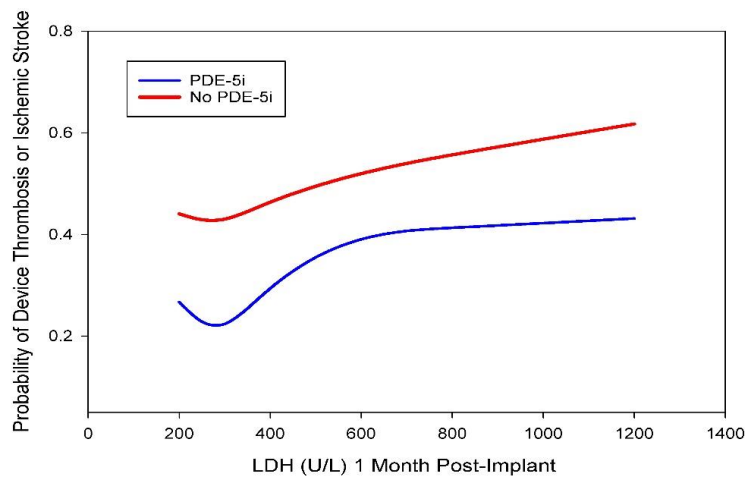

**Figure S10. Cumulative incidence curves for hemorrhagic stroke.**

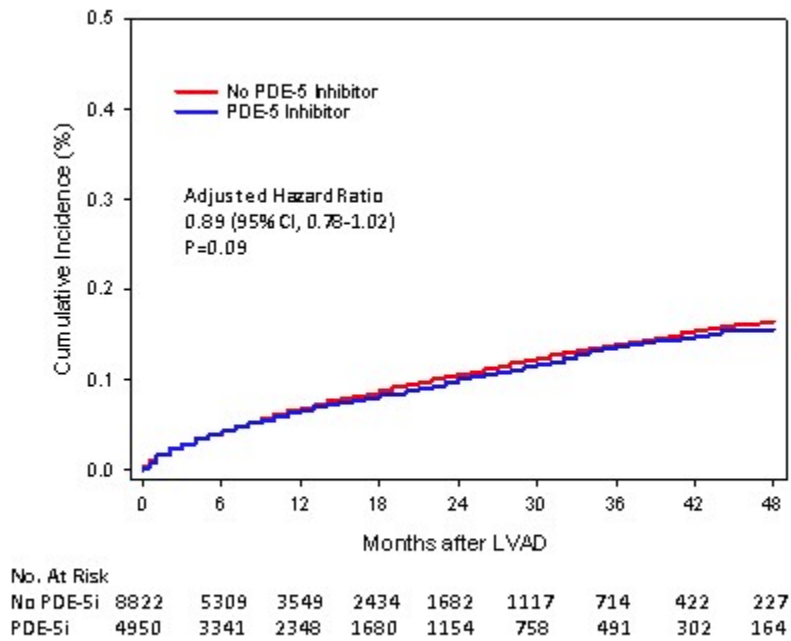

There was no significant difference between the 2 groups (PDE-5 inhibitor versus no PDE-5 inhibitor).

**Figure S11. Cumulative incidence curves for gastrointestinal bleeding.**

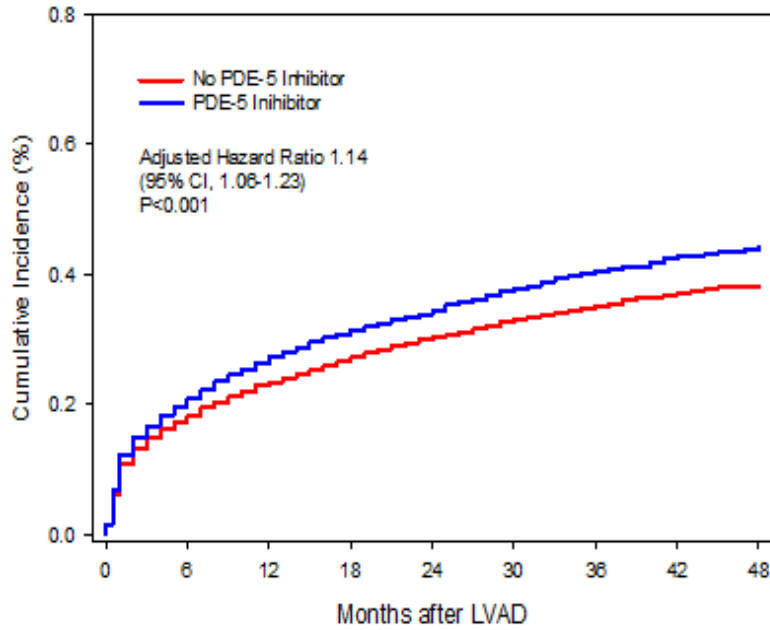

**No. At Risk**

|           |      |      |      |      |      |     |     |     |     |
|-----------|------|------|------|------|------|-----|-----|-----|-----|
| No PDE-5i | 8822 | 4414 | 2776 | 1838 | 1201 | 754 | 462 | 256 | 136 |
| PDE-5i    | 4950 | 2774 | 1791 | 1204 | 774  | 483 | 288 | 179 | 102 |

Patients on PDE-5 inhibitors had 14% increased risk for gastrointestinal bleeding compared to those not on PDE-5 inhibitors
